# Supplementary material for: Mechanisms of kinetic stabilization by the drugs paclitaxel and vinblastine
Source: PubMed Central journal article supplement — Mol Biol Cell. 2017 May 1;28(9):1238–57. doi: 10.1091/mbc.E16-08-0567 (PMC5415019; doi:10.1091/mbc.e16-08-0567), 2017-05-01

# Supplemental Materials

*Molecular Biology of the Cell*

Castle et al.

## SUPPLEMENTAL TABLES

Table S1. Summary of published MTA results in live cells

| Microtubule-binding Agent                                | Concentration Range (nM) | Cell Line  | Growth Rate | Shortening Rate | Pause | Dynamicity | Reference                          |
|----------------------------------------------------------|--------------------------|------------|-------------|-----------------|-------|------------|------------------------------------|
| <b>Colchicine Binding Domain (Disassembly-promoters)</b> |                          |            |             |                 |       |            |                                    |
| 2-Methoxyestradiol                                       | 1200                     | MCF7       | -           | ns              | +     | -          | (Kamath <i>et al.</i> , 2006)      |
| Benomyl                                                  | 3,000-5,000              | MCF7       | -           | -               | +     | -          | (Rathinasamy and Panda, 2008)      |
| Carbendazim                                              | 5,000-30,000             | MCF7       | -           | -               | +     | -          | (Yenjerla <i>et al.</i> , 2009)    |
| Colcemid                                                 | 0.01-50                  | CHO        | -           | -               | +     | -          | (Yang <i>et al.</i> , 2010)        |
| Diaminotiazole                                           | 80-1600                  | LLC-PK1    | -           | -               | +     | -          | (Thomas <i>et al.</i> , 2014)      |
| Indanocine                                               | 2-5                      | MDA-MB-231 | -           | -               | +     | -          | (Kapoor and Panda, 2012)           |
| Nocodazole                                               | 50-200                   | NRK        | -           | -               | +     | -          | (Mikhailov and Gundersen, 1998)    |
| Nocodazole                                               | 4-400                    | Newt Lung  | -           | -               | +     | -          | (Vasquez <i>et al.</i> , 1997)     |
| Nocodazole                                               | 4-500                    | BSC-1      | -           | -               | +     | -          | (Vasquez <i>et al.</i> , 1997)     |
| TN16                                                     | 25-50                    | MCF7       | -           | -               | +     | -          | (Rai <i>et al.</i> , 2015)         |
| <b>Taxane Binding Domain (Assembly-promoters)</b>        |                          |            |             |                 |       |            |                                    |
| Cabazitaxel                                              | 2                        | MCF7       | -           | -               | +     | -          | (Azarenko <i>et al.</i> , 2014b)   |
| Discodermolide                                           | 7-83                     | A549       | -           | -               | +     | -          | (Honore <i>et al.</i> , 2003)      |
| Docetaxel                                                | 2                        | MCF7       | -           | -               | +     | -          | (Azarenko <i>et al.</i> , 2014b)   |
| Docetaxel                                                | 0.3-3                    | HUVECs     | ns          | -               | ns    | -          | (Kamath <i>et al.</i> , 2014)      |
| Epothilone B                                             | 5.1                      | MCF7       | -           | -               | +     | -          | (Chan <i>et al.</i> , 2011)        |
| Epothilone B                                             | 0.2-3.5                  | MCF7       | -           | -               | +     | -          | (Kamath and Jordan, 2003)          |
| Epothilone B                                             | 1-10                     | U87MG      | -           | -               | +     | -          | (Pagano <i>et al.</i> , 2012)      |
| Paclitaxel                                               | 100-500                  | HeLa       | -           | -               | +     | -          | (Jordan <i>et al.</i> , 1993)      |
| Paclitaxel                                               | 50-100                   | NRK        | -           | -               | +     | -          | (Mikhailov and Gundersen, 1998)    |
| Paclitaxel                                               | 0.1-100                  | HMEC-1     | +/-ns       | +/-             | -/+   | +/-        | (Pasquier <i>et al.</i> , 2005)    |
| Paclitaxel                                               | 0.1-100                  | HUVECs     | +/-ns       | +/-             | -/+   | +/-        | (Pasquier <i>et al.</i> , 2005)    |
| Paclitaxel                                               | 0.1-2                    | A549       | -           | -               | +     | -          | (Pasquier <i>et al.</i> , 2005)    |
| Paclitaxel                                               | 100                      | A-498      | -           | -               | +     | -          | (Yvon <i>et al.</i> , 1999)        |
| Paclitaxel                                               | 30                       | Caov-C     | -           | -               | ns    | -          | (Yvon <i>et al.</i> , 1999)        |
| Paclitaxel                                               | 1.6-20                   | NCI-H460   | -           | -               | +     | -          | (Gan <i>et al.</i> , 2010)         |
| Paclitaxel                                               | 1-3                      | HUVECs     | ns          | -               | +     | -          | (Kamath <i>et al.</i> , 2014)      |
| Paclitaxel                                               | 50-150                   | MCF7       | -           | -               | +     | -          | (Risinger <i>et al.</i> , 2014)    |
| Paclitaxel                                               | 7.5                      | MCF7       | -           | -               | nd    | -          | (Jordan and Kamath, 2007)          |
| Paclitaxel                                               | 1-50                     | CHO        | -           | -               | +     | -          | (Ganguly <i>et al.</i> , 2010)     |
| <b>Vinca Binding Domain (Disassembly-promoters)</b>      |                          |            |             |                 |       |            |                                    |
| BCFMT                                                    | 10,000                   | MCF7       | -           | -               | +     | -          | (Rai <i>et al.</i> , 2012)         |
| Eribulin                                                 | 1                        | MCF7       | -           | ns              | ns    | -          | (Jordan <i>et al.</i> , 2005)      |
| Vinblastine                                              | 8-64                     | BSC-1      | +/-         | -               | +     | -          | (Dhamodharan <i>et al.</i> , 1995) |
| Vinblastine                                              | 3-7.5                    | HeLa       | -           | nd              | nd    | nd         | (Mohan <i>et al.</i> , 2013)       |
| Vinblastine                                              | 0.05-15                  | CHO        | -           | -               | +     | -          | (Yang <i>et al.</i> , 2010)        |
| Vinblastine                                              | 1                        | MCF7       | -           | -               | nd    | -          | (Jordan and Kamath, 2007)          |
| Vincristine                                              | 2-40                     | NCI-H460   | -           | -               | +     | -          | (Gan <i>et al.</i> , 2010)         |
| Vinflunine                                               | 50                       | SK-N-SH    | -           | -               | ns    | -          | (Pourroy <i>et al.</i> , 2004)     |
| Vinflunine                                               | 0.1-20                   | HMEC-1     | +/-         | +/-             | -/+   | +/-        | (Pourroy <i>et al.</i> , 2006)     |
| Vinflunine                                               | 15                       | MCF7       | -           | ns              | nd    | -          | (Jordan and Kamath, 2007)          |
| <b>Other</b>                                             |                          |            |             |                 |       |            |                                    |
| Curcumin                                                 | 5,000-12,000             | MCF7       | -           | -               | +     | -          | (Banerjee <i>et al.</i> , 2010)    |
| Erucin                                                   | 5,000-15,000             | MCF7       | -           | -               | +     | -          | (Azarenko <i>et al.</i> , 2014a)   |
| Estramustine                                             | 2,000-5,000              | MCF7       | -           | -               | +     | -          | (Mohan and Panda, 2008)            |
| Noscapine                                                | 25,000-250,000           | PTK2       | -           | -               | +     | -          | (Landen <i>et al.</i> , 2002)      |
| Peloruside A                                             | 3.8-100                  | MCF7       | -           | -               | +     | -          | (Chan <i>et al.</i> , 2011)        |
| Taccalonolide AJ                                         | 25-100                   | MCF7       | -           | -               | +     | -          | (Risinger <i>et al.</i> , 2014)    |

ns = not statistically significant, nd = not determined, (/) = lower conc./higher conc.  
 + increased value, - decreased value

Table S2. Recovery of tubulin fluorescence after photobleaching

| Condition | [ <i>Tub</i> ] Fraction | Fold Change | Polymer Fraction | Fold Change | p-value to Control   |
|-----------|-------------------------|-------------|------------------|-------------|----------------------|
| Control   | 0.20 ± 0.01             | -           | 0.80 ± 0.01      | -           | -                    |
| 10nM pac  | 0.13 ± 0.01             | 0.65        | 0.87 ± 0.01      | 1.09        | 0.058                |
| 100nM pac | 0.11 ± 0.01             | 0.55        | 0.89 ± 0.01      | 1.11        | 0.018                |
| 10nM vin  | 0.39 ± 0.01             | 1.95        | 0.61 ± 0.01      | 0.76        | 1.5x10 <sup>-8</sup> |
| 100nM vin | 0.60 ± 0.03             | 3.02        | 0.40 ± 0.03      | 0.50        | 1x10 <sup>-8</sup>   |

Table S3. *In vitro* simulation base parameters for dynamic instability

| Symbol                     | Parameter                        | Value                                               | Reference                                                                                         |
|----------------------------|----------------------------------|-----------------------------------------------------|---------------------------------------------------------------------------------------------------|
| $\Delta G^0_{\text{lat}}$  | Lateral bond free energy         | -5.7 k <sub>B</sub> T                               | (VanBuren <i>et al.</i> , 2002, 2005; Gardner <i>et al.</i> , 2011; Coombes <i>et al.</i> , 2013) |
| $\Delta G^0_{\text{long}}$ | Longitudinal bond free energy    | -7.2 k <sub>B</sub> T                               | (Gardner <i>et al.</i> , 2011; Coombes <i>et al.</i> , 2013)                                      |
| $\Delta\Delta G^0$         | Energetic penalty of GDP-tubulin | +3.3 k <sub>B</sub> T                               | Model fit; (VanBuren <i>et al.</i> , 2002)                                                        |
| [ <i>Tub</i> ]             | Free tubulin concentration       | 5.6 μM                                              | (Schek <i>et al.</i> , 2007; Gardner <i>et al.</i> , 2011)                                        |
| $k_{\text{on,PF}}$         | On-rate constant                 | 6 s <sup>-1</sup> μM <sup>-1</sup> PF <sup>-1</sup> | (Gardner <i>et al.</i> , 2011)                                                                    |
| $k_{\text{hyd}}$           | Hydrolysis rate constant         | 0.2 s <sup>-1</sup>                                 | Model constrained; (Coombes <i>et al.</i> , 2013)                                                 |
| $\sigma_1$                 | One-neighbor on-rate penalty     | 2                                                   | (Castle and Odde, 2013)                                                                           |
| $\sigma_2$                 | Two-neighbor on-rate penalty     | 10                                                  | (Castle and Odde, 2013)                                                                           |

Table S4. *In vivo* simulation base parameters for dynamic instability

| Symbol                     | Parameter                           | Value                                                 | Reference                                                     |
|----------------------------|-------------------------------------|-------------------------------------------------------|---------------------------------------------------------------|
| $\Delta G^0_{\text{lat}}$  | Lateral bond free energy            | -5.0 k <sub>B</sub> T                                 | Fit to experimental data                                      |
| $\Delta G^0_{\text{long}}$ | Longitudinal bond free energy       | -8.0 k <sub>B</sub> T                                 | Fit to experimental data                                      |
| $\Delta\Delta G^0$         | Energetic penalty of GDP-tubulin    | +3.6 k <sub>B</sub> T                                 | Model fit; (VanBuren <i>et al.</i> , 2002)                    |
| [ <i>Tub</i> ]             | Free tubulin concentration          | 7 μM                                                  | (Seetapun <i>et al.</i> , 2012)                               |
| $k_{\text{on,PF}}$         | On-rate constant                    | 30 s <sup>-1</sup> μM <sup>-1</sup> PF <sup>-1</sup>  | Fit to experimental data                                      |
| $k_{\text{hyd}}$           | Hydrolysis rate constant            | 0.8 s <sup>-1</sup>                                   | Figure 2F                                                     |
| $\sigma_1$                 | One-neighbor on-rate penalty        | 2                                                     | (Castle and Odde, 2013)                                       |
| $\sigma_2$                 | Two-neighbor on-rate penalty        | 10                                                    | (Castle and Odde, 2013)                                       |
| $D_k$                      | Kinesin motor diffusion coefficient | 0.38 μm <sup>2</sup> s <sup>-1</sup>                  | (Helenius <i>et al.</i> , 2006; Coombes <i>et al.</i> , 2013) |
| [ <i>Kin</i> ]             | Motor concentration                 | 5 nM                                                  |                                                               |
| $k_{\text{on,k}}$          | Kinesin on-rate constant            | 0.6 μm <sup>-1</sup> nM <sup>-1</sup> s <sup>-1</sup> | (Helenius <i>et al.</i> , 2006)                               |
| $k_{\text{off,k}}$         | Kinesin off-rate                    | 2 s <sup>-1</sup>                                     | (Helenius <i>et al.</i> , 2006)                               |
| $x_{\text{cell}}$          | Cell membrane mean position         | 10 μm                                                 | Experimental data                                             |
| $K_{\text{cell}}$          | Cell membrane stiffness             | 500 pN/μm                                             | (Tinevez <i>et al.</i> , 2009)                                |

Table S5. *In vitro* growth rate versus free tubulin concentration

| Condition | Slope (nm s <sup>-1</sup> μM <sup>-1</sup> ) | Comparison to Control  | Fold Decrease from Control |
|-----------|----------------------------------------------|------------------------|----------------------------|
| Control   | 1.46 ± 0.07                                  | -                      | 1.0                        |
| 10nM pac  | 1.16 ± 0.10                                  | p = 0.056              | 1.26                       |
| 100nM pac | 1.03 ± 0.13                                  | p = 0.017              | 1.42                       |
| 500nM vin | 0.48 ± 0.06                                  | p = 4x10 <sup>-9</sup> | 3.04                       |

## SUPPLEMENTAL FIGURE LEGENDS

**Figure S1.** Attenuation of microtubule dynamics by paclitaxel and vinblastine, related to Figure 1 and 2. Example kymographs from LLC-PK1 cells stably expressing EGFP- $\alpha$ -tubulin (A) or EB1-EGFP (B). All kymographs are on the same scale. (C) Estimated dynamic instability parameters in the presence of paclitaxel and vinblastine *in vivo*. In each plot, control values are shown in black, while paclitaxel and vinblastine are shown in cyan and magenta, respectively (light = 10 nM and dark = 100 nM). *In vivo* data collected at 1s intervals ( $n > 35$  microtubules from  $> 10$  cells in each condition). N.D. = not determined due to the absence of detectable growth or shortening events. All error bars are mean  $\pm$  SEM. \*  $p < 0.05$ , \*\*  $p < 0.01$  compared to control. D) Maximum intensity projections of 20 s time lapse of EB1-EGFP expressing LLC-PK1 cells treated with DMSO (control, top), 100 nM paclitaxel (middle), or 10 nM vinblastine (bottom). Regions within white squares are magnified to the right. (E) Representative images of LLC-PK1 $\alpha$  cells treated with 1  $\mu$ M paclitaxel (top) or 1  $\mu$ M vinblastine (bottom).

**Figure S2.** *In vitro* model makes similar predictions to the *in vivo* model with regards to dynamic instability and kinetic stabilization, related to Figure 4. (A) *In vitro* model net assembly rate for varying lateral ( $\Delta G^0_{lat}$ ) and longitudinal ( $\Delta G^0_{long}$ ) bond free energy ( $k_{on,PF} = 6 \mu\text{M}^{-1}\text{s}^{-1}\text{PF}^{-1}$  and  $[Tub] = 5.6 \mu\text{M}$ ; contours best-fit by a polynomial), similar to that shown for the *in vivo* parameter set in Figure 3B. Cyan, red, and black circles denote the reference points for GTP, GDP, and  $\Delta G^0_{tot}(v = 0)$ , respectively. (B) Representative microtubule length versus time traces for the *in vitro* dynamic instability parameters listed in Table S3. Similar plots for experimental data can be found in Figure S3A. (C) The net-rate of microtubule assembly as a function of bond stabilization of both GTP- and GDP-tubulin ( $\Delta\Delta G^0$  is maintained) with concurrent changes in the on-rate. All kinetic rate values were normalized to the base case for *in vitro* dynamic instability (Table S3). (D) Microtubule net-rate as a function of decreasing energetic difference between GTP- and GDP-tubulin ( $\Delta\Delta G^0$ ) with concurrent change of the on-rate for an assembly-promoter. (E) Microtubule net-rate as a function of decreasing energetic difference between GTP- and GDP-tubulin ( $\Delta\Delta G^0$ ) with concurrent change in the on-rate for a disassembly-promoter. In C-E, the bold boxes indicate points where dynamic instability was observed. All kinetic rate values were normalized to the base case for *in vitro* dynamic instability (Table S3). The rate reported for points of dynamic instability is the average growth rate.

**Figure S3.** Comparison of model predictions associated with the mechanisms of kinetic stabilization. (A) Figures 4B and D from the main text are shown. Implementing system-wide parameter changes initially identified the model-predicted mechanisms of kinetic stabilization. Estimating drug effects by this type of sensitivity analysis effectively assumes that tubulin subunits are completely saturated with the drug. Therefore, we performed additional simulations that incorporated drug on-off kinetics (see Methods), shown in B. (B) Similar plots to those shown in A, where drug kinetics are now accounted for. Here the kinetics and thermodynamics of tubulin subunits where the drug was bound were adjusted according to the values along each axis. Based on our experimental observations shown in Figure 1F, we assumed that  $[drug] = 10^*K_D$  in all simulations shown in B, which resulted in approximately 91% saturation of tubulin subunits. Similar predictions are observed in each case: comparable parameter changes lead to kinetic stabilization in each case and observed trends regarding net-rates are observed, i.e. true kinetic stabilization desensitizes the growth rate to changes in  $[Tub]$  compared to pseudo-kinetic stabilization (as shown in Figure 5 of the main text). The region of pseudo-kinetic stabilization is diminished in the case where drug kinetics are simulated (B, lower). However, there remains a transition between positive and negative net-rates within this region, such that if the y-axis were sampled in a finer manner the net-rate could eventually be dialed into zero. Experimentally this would be accomplished by tubulin mass conservation (Figure 2A-C in the main text).

**Figure S4.** Example microtubule length traces across a range of tubulin concentrations *in vitro*, related to Figure 5. (A) Control, (B) 100 nM paclitaxel, and (C) 500 nM vinblastine. Individual tubulin concentrations are indicated, in each case concentration increases from left to right.

**Figure S5.** Model predictions for kinetic stabilization and the observation of dynamic instability generally, related to Figures 3, 4, and 6. (A-B) Model-predicted net rate (A) and assembly variance (B) as a function of varying  $k^*_{on,PF}$  and  $k_{off,PF}$  in the case where the stabilizing effect on  $k_{off,PF}$  is implemented through the

longitudinal bond. (A) and (B) are identical to Figure 6C and are reproduced here for the purpose of comparison. (C-D) Model-predicted net rate (C) and assembly variance (D) as a function of varying  $k_{\text{on,PF}}^*$  and  $k_{\text{off,PF}}$  in the case where the stabilizing effect on  $k_{\text{off,PF}}$  is implemented through the lateral bond. All kinetic rate values were normalized to the base case for *in vitro* dynamic instability (Table S3). (E) Dynamic instability in the *in vitro* model. Lateral and longitudinal bond energies,  $\Delta G^{\text{lat}}$  and  $\Delta G^{\text{long}}$ , were varied from -4 to -10  $k_B T$  while all other parameters were held constant, unless indicated. Open circles denote the GTP-tubulin reference state (GDP-tubulin lateral bond is shifted by  $\Delta\Delta G^0$ ) for individual simulations where dynamic instability was observed. Colors for different hydrolysis rates used in the simulation where black, red, and green represent  $k_{\text{hyd}} = 0.2, 0.4, \text{ and } 1.0 \text{ s}^{-1}$ , respectively. Colored regions are a general fit to where dynamic instability was observed for each value of  $k_{\text{hyd}}$ . Dashed black line is the  $v = 0 \text{ nm/s}$  contour from Figure S2A. Dashed gray line is the same contour offset by  $\Delta\Delta G^0$  to indicate the initial constraints placed on the location for the GTP-tubulin reference state for the observation of dynamic instability. (F) Dynamic instability in the *in vivo* model. Again  $\Delta G^{\text{lat}}$  and  $\Delta G^{\text{long}}$ , were varied from -4 to -10  $k_B T$  while all other parameters (shown in Table S4) were held constant. Dots indicate sample points where dynamic instability was observed, while the color indicates the observed rate during periods of growth. Dashed black line is the  $v = 0 \text{ nm/s}$  contour from Figure 3B. Dashed gray line is the same contour offset by  $\Delta\Delta G^0$  to indicate the initial constraints placed on the location for the GTP-tubulin reference state in the *in vivo* model. Shaded region is that constrained is approximate fit to the points where dynamic instability was observed. Because the GTP-tubulin state undergoes net assembly, its value of  $\Delta G^{\text{tot}}$  must be more negative than the value required for net assembly ( $\Delta G^{\text{tot}}; v = 0 \text{ nm/s}$  contour from Figures 3B and S2A). Second, for the GDP-tubulin state to disassemble, the GTP value of  $\Delta G^{\text{lat}}$  must be within  $+\Delta\Delta G^0$  of the  $v = 0$  contour (A and B). If it is further away, then the value of  $\Delta\Delta G^0$  will not permit switching to a state of net disassembly, but rather two states that grow at different rates. Thus the reference GTP-tubulin point for dynamic instability is constrained to a region of parameter space with a slope of negative one and width of  $\Delta\Delta G^0$ . Because the observation of dynamic instability is constrained, small changes in either  $\Delta G^{\text{lat}}$  or  $\Delta G^{\text{long}}$  ( $<1 k_B T$  *in vitro* and  $\sim 1.5 k_B T$  *in vivo*) are sufficient to eliminate it. In the region of more negative  $\Delta G^{\text{tot}}$  (lower left), the microtubule grows continuously without catastrophe. Here, the GTP cap is too large for stochastic fluctuations in cap size to result in catastrophe. In the region of more positive  $\Delta G^{\text{tot}}$  (upper right), the microtubule is unable to maintain a GTP cap and therefore cannot grow. Similarly, only small perturbations in  $k_{\text{hyd}}$  ( $\pm 0.2 \text{ s}^{-1}$ ) are necessary to eliminate dynamic instability at a given point in the 2D parameter space shown in A. In the limit as  $k_{\text{hyd}}$  approaches  $0 \text{ s}^{-1}$ , dynamic instability is lost as the microtubule becomes a single-state polymer that is constantly in the GTP-tubulin state. Additionally,  $k_{\text{hyd}} \geq 2 \text{ s}^{-1}$  was sufficient to eliminate dynamic instability altogether because the resulting GTP cap was too small to maintain growth for any state within the constraints placed by the  $v = 0$  contour and the value of  $\Delta\Delta G^0$ . Where dynamic instability was observed in the *in vivo* parameter set, microtubules with more negative  $\Delta G^{\text{long}}$  (B, lower right) exhibited a higher growth rate compared to those with more negative  $\Delta G^{\text{lat}}$  (B, upper left). The constraints placed on the observation of dynamic instability by the model indicate several things. First, slightly altering either bond free energy ( $\Delta G^{\text{lat}}$  or  $\Delta G^{\text{long}}$ ) or similarly  $k_{\text{hyd}}$  could, in principle, be a viable mechanism for MTAs to eliminate dynamic instability, as each results in the loss of ability to switch between assembly states. Second, tradeoff between lateral and longitudinal bond free energy maintains dynamic instability rather than eliminating it, thus serving a way to alter the dynamics of individual microtubules without inducing kinetic stabilization (as is the case with MAPs).

**Figure S6.** Additional experimental observations in the presence of paclitaxel and vinblastine, related to Figures 7 and 8. (A-B) Estimated diffusion coefficients of EGFP (A) and 2x-EGFP (B) in LLC-PK1 cells treated with either 100 nM paclitaxel (cyan) or vinblastine (magenta). Error bars are mean  $\pm$  SEM. (C) Microtubule tip structures in the presence of paclitaxel and vinblastine. *In vivo* model-predicted protofilament length standard deviation for each kinetic stabilization parameter set, averaged for ten separate microtubule trajectories (left) or cumulative for all microtubules (right). Control microtubules were simulated with the parameters listed in Table S4, while each kinetic stabilization case was sampled from the ellipsoidal regions in Figure 6C-D (or equivalent for cases not shown in Figure 6). tKS = true kinetic stabilization mechanism where the stabilization is applied either through the longitudinal (long) or lateral (lat) bond. pKS = pseudo-kinetic stabilization for an assembly- or disassembly-promoter. Error bars are mean  $\pm$  SEM. (D) Experimentally estimated tip structures in live cells average across individual microtubules (left) or cumulative for all microtubules (right). Tip standard deviation was estimated by

fitting a Gaussian survival function to the fluorescence intensity along the microtubule axis as previously described (Demchouk *et al.*, 2011) after subtracting out the local background fluorescence parallel to the microtubule axis. \*\* $p < 0.01$  by multiple comparisons test. (E) Examples of extended tip structures observed in the presence of 100nM vinblastine. Arrows denote points where the fluorescence intensity along the microtubule abruptly drops, suggestive of an abrupt change in protofilament number. These extended tapers in the presence of vinblastine were stable over the course of acquisition (20 s). Due to the binding/unbinding rate of the drug, it is unlikely that these are a direct result of vinblastine. It is possible that a subset of protofilaments have been stabilized against disassembly by membrane-bound motors such as dynein (Bicek *et al.*, 2009).

## SUPPLEMENTAL MOVIE CAPTIONS

**Movie S1.** Control simulation output. Left, animated output of the microtubule structure is shown on the left where GTP- and GDP-tubulin subunits are represented by the same color scheme used in Figure 3A. Parameters used in the simulation are described in Table S4. Upper right, the red circle denotes the microtubule length and GTP-cap size (total number of GTP-tubulin subunits in the lattice) at the current time point, corresponding to the structure on the left. Middle right, simulated image of tubulin and EB1 fluorescence using the structures shown on the left. Images were created as previously described (Gardner *et al.*, 2010; Demchouk *et al.*, 2011; Seetapun *et al.*, 2012) using the statistics (mean and standard deviation) of the cell background fluorescence and microtubule signal, averaged across all images used in analysis of control microtubule dynamics.

**Movie S2.** Simulation output from parameter space which is consistent with vinblastine experimental results *in vivo*. Left, animated output of the microtubule structure using the parameters indicated by the asterisk in Figure 6C. Upper right, the red circle denotes the microtubule length and GTP-cap size (total number of GTP-tubulin subunits in the lattice) at the current time point, corresponding to the structure on the left. Middle right, simulated image of tubulin and EB1 fluorescence using the structures shown on the left. Images were created as previously described (Gardner *et al.*, 2010; Demchouk *et al.*, 2011; Seetapun *et al.*, 2012) using the statistics (mean and standard deviation) of the cell background fluorescence and microtubule signal, averaged across all images used in analysis of microtubule dynamics in the presence of either 100nM or 10nM vinblastine for the tubulin or EB1 fluorescence, respectively.

**Movie S3:** Simulation output from parameter space which is consistent with paclitaxel experimental results *in vivo*. Left, animated output of the microtubule structure using the parameters indicated by the asterisk in Figure 6D. Upper right, the red circle denotes the microtubule length and GTP-cap size (total number of GTP-tubulin subunits in the lattice) at the current time point, corresponding to the structure on the left. Middle right, simulated image of tubulin and EB1 fluorescence using the structures shown on the left. Images were created as previously described (Gardner *et al.*, 2010; Demchouk *et al.*, 2011; Seetapun *et al.*, 2012) using the statistics (mean and standard deviation) of the cell background fluorescence and microtubule signal, averaged across all images used in analysis of microtubule dynamics in the presence of 100nM paclitaxel.

## SUPPLEMENTAL REFERENCES

- Azarenko, O., Jordan, M. A., and Wilson, L. (2014a). Erucin, the major isothiocyanate in arugula (*Eruca sativa*), inhibits proliferation of MCF7 tumor cells by suppressing microtubule dynamics. *PLoS One* 9, e100599.
- Azarenko, O., Smiyun, G., Mah, J., Wilson, L., and Jordan, M. A. (2014b). Antiproliferative mechanism of action of the novel taxane cabazitaxel as compared with the parent compound docetaxel in MCF7 breast cancer cells. *Mol. Cancer Ther.* 13, 2092–2103.
- Banerjee, M., Singh, P., and Panda, D. (2010). Curcumin suppresses the dynamic instability of microtubules, activates the mitotic checkpoint and induces apoptosis in MCF-7 cells. *FEBS J.* 277, 3437–3448.
- Bicek, A. D., Tüzel, E., Demtchouk, A., Uppalapati, M., Hancock, W. O., Kroll, D. M., and Odde, D. J. (2009). Anterograde microtubule transport drives microtubule bending in LLC-PK1 epithelial cells. *Mol. Biol. Cell* 20, 2943–2953.
- Castle, B. T., and Odde, D. J. (2013). Brownian dynamics of subunit addition-loss kinetics and thermodynamics in linear polymer self-assembly. *Biophys. J.* 105, 2528–2540.
- Chan, A., Andreea, P. M., Northcote, P. T., and Miller, J. H. (2011). Peloruside A inhibits microtubule dynamics in a breast cancer cell line MCF7. *Invest. New Drugs* 29, 615–626.
- Coombes, C. E., Yamamoto, A., Kenzie, M. R., Odde, D. J., and Gardner, M. K. (2013). Evolving Tip Structures Can Explain Age-Dependent Microtubule Catastrophe. *Curr. Biol.* 23, 1342–1348.
- Demtchouk, A. O., Gardner, M. K., and Odde, D. J. (2011). Microtubule Tip Tracking and Tip Structures at the Nanometer Scale Using Digital Fluorescence Microscopy. *Cell. Mol. Bioeng.* 4, 192–204.
- Dhamodharan, R., Jordan, M. A., Thrower, D., Wilson, L., and Wadsworth, P. (1995). Vinblastine suppresses dynamics of individual microtubules in living interphase cells. *Mol. Biol. Cell* 6, 1215–1229.
- Gan, P. P., McCarroll, J. A., Po'uha, S. T., Kamath, K., Jordan, M. A., and Kavallaris, M. (2010). Microtubule dynamics, mitotic arrest, and apoptosis: drug-induced differential effects of betaIII-tubulin. *Mol. Cancer Ther.* 9, 1339–1348.
- Ganguly, A., Yang, H., and Cabral, F. (2010). Paclitaxel-dependent cell lines reveal a novel drug activity. *Mol. Cancer Ther.* 9, 2914–2923.
- Gardner, M. K., Charlebois, B. D., Jánosi, I. M., Howard, J., Hunt, A. J., and Odde, D. J. (2011). Rapid microtubule self-assembly kinetics. *Cell* 146, 582–592.
- Gardner, M. K., Sprague, B. L., Pearson, C. G., Cosgrove, B. D., Bicek, A. D., Bloom, K., Salmon, E. D., and Odde, D. J. (2010). Model Convolution: A Computational Approach to Digital Image Interpretation. *Cell. Mol. Bioeng.* 3, 163–170.
- Helenius, J., Brouhard, G., Kalaidzidis, Y., Diez, S., and Howard, J. (2006). The depolymerizing kinesin MCAK uses lattice diffusion to rapidly target microtubule ends. *Nature* 441, 115–119.
- Honore, S., Kamath, K., Braguer, D., Wilson, L., Briand, C., and Jordan, M. A. (2003). Suppression of microtubule dynamics by discodermolide by a novel mechanism is associated with mitotic arrest and inhibition of tumor cell proliferation. *Mol. Cancer Ther.* 2, 1303–1311.
- Jordan, M. A., and Kamath, K. (2007). How do microtubule-targeted drugs work? An overview. *Curr. Cancer Drug Targets* 7, 730–742.
- Jordan, M. A., Kamath, K., Manna, T., Okouneva, T., Miller, H. P., Davis, C., Littlefield, B. A., and Wilson, L. (2005). The primary antimetabolic mechanism of action of the synthetic halichondrin E7389 is suppression of microtubule growth. *Mol. Cancer Ther.* 4, 1086–1095.
- Jordan, M. A., Toso, R. J., Thrower, D., and Wilson, L. (1993). Mechanism of mitotic block and inhibition of cell proliferation by taxol at low concentrations. *Proc. Natl. Acad. Sci. U. S. A.* 90, 9552–9556.
- Kamath, K., and Jordan, M. A. (2003). Suppression of microtubule dynamics by epothilone B is associated with mitotic arrest. *Cancer Res.* 63, 6026–6031.
- Kamath, K., Okouneva, T., Larson, G., Panda, D., Wilson, L., and Jordan, M. A. (2006). 2-Methoxyestradiol suppresses microtubule dynamics and arrests mitosis without depolymerizing microtubules. *Mol. Cancer Ther.* 5, 2225–2233.
- Kamath, K., Smiyun, G., Wilson, L., and Jordan, M. A. (2014). Mechanisms of inhibition of endothelial cell migration by taxanes. *Cytoskeleton (Hoboken)*. 71, 46–60.
- Kapoor, S., and Panda, D. (2012). Kinetic stabilization of microtubule dynamics by indanocine perturbs EB1

localization, induces defects in cell polarity and inhibits migration of MDA-MB-231 cells. *Biochem. Pharmacol.* **83**, 1495–1506.

Landen, J. W. *et al.* (2002). Noscapine alters microtubule dynamics in living cells and inhibits the progression of melanoma. *Cancer Res.* **62**, 4109–4114.

Mikhailov, A., and Gundersen, G. G. (1998). Relationship between microtubule dynamics and lamellipodium formation revealed by direct imaging of microtubules in cells treated with nocodazole or taxol. *Cell Motil. Cytoskeleton* **41**, 325–340.

Mohan, R., Katrukha, E. A., Doodhi, H., Smal, I., Meijering, E., Kapitein, L. C., Steinmetz, M. O., and Akhmanova, A. (2013). End-binding proteins sensitize microtubules to the action of microtubule-targeting agents. *Proc. Natl. Acad. Sci. U. S. A.* **110**, 8900–8905.

Mohan, R., and Panda, D. (2008). Kinetic stabilization of microtubule dynamics by estramustine is associated with tubulin acetylation, spindle abnormalities, and mitotic arrest. *Cancer Res.* **68**, 6181–6189.

Pagano, A., Honoré, S., Mohan, R., Berges, R., Akhmanova, A., and Braguer, D. (2012). Etoposide B inhibits migration of glioblastoma cells by inducing microtubule catastrophes and affecting EB1 accumulation at microtubule plus ends. *Biochem. Pharmacol.* **84**, 432–443.

Pasquier, E., Honore, S., Pourroy, B., Jordan, M. A., Lehmann, M., Briand, C., and Braguer, D. (2005). Antiangiogenic concentrations of paclitaxel induce an increase in microtubule dynamics in endothelial cells but not in cancer cells. *Cancer Res.* **65**, 2433–2440.

Pourroy, B., Carre, M., Honore, S., Bourgarel-Rey, V., Kruczynski, A., Briand, C., and Braguer, D. (2004). Low Concentrations of Vinflunine Induce Apoptosis in Human SK-N-SH Neuroblastoma Cells through a Postmitotic G1 Arrest and a Mitochondrial Pathway. *Mol. Pharmacol.* **66**, 580–591.

Pourroy, B., Honoré, S., Pasquier, E., Bourgarel-Rey, V., Kruczynski, A., Briand, C., and Braguer, D. (2006). Antiangiogenic concentrations of vinflunine increase the interphase microtubule dynamics and decrease the motility of endothelial cells. *Cancer Res.* **66**, 3256–3263.

Rai, A., Kapoor, S., Singh, S., Chatterji, B. P., and Panda, D. (2015). Transcription factor NF- $\kappa$ B associates with microtubules and stimulates apoptosis in response to suppression of microtubule dynamics in MCF-7 cells. *Biochem. Pharmacol.* **93**, 277–289.

Rai, A., Surolia, A., and Panda, D. (2012). An antitubulin agent BCFMT inhibits proliferation of cancer cells and induces cell death by inhibiting microtubule dynamics. *PLoS One* **7**, e44311.

Rathinasamy, K., and Panda, D. (2008). Kinetic stabilization of microtubule dynamic instability by benomyl increases the nuclear transport of p53. *Biochem. Pharmacol.* **76**, 1669–1680.

Risinger, A. L., Riffle, S. M., Lopus, M., Jordan, M. A., Wilson, L., and Mooberry, S. L. (2014). The taccalonolides and paclitaxel cause distinct effects on microtubule dynamics and aster formation. *Mol. Cancer* **13**, 41.

Schek, H. T., Gardner, M. K., Cheng, J., Odde, D. J., and Hunt, A. J. (2007). Microtubule assembly dynamics at the nanoscale. *Curr. Biol.* **17**, 1445–1455.

Seetapun, D., Castle, B. T., McIntyre, A. J., Tran, P. T., and Odde, D. J. (2012). Estimating the microtubule GTP cap size in vivo. *Curr. Biol.* **22**, 1681–1687.

Thomas, N. E., Thamkachy, R., Sivakumar, K. C., Sreedevi, K. J., Louis, X. L., Thomas, S. A., Kumar, R., Rajasekharan, K. N., Cassimeris, L., and Sengupta, S. (2014). Reversible action of diaminothiazoles in cancer cells is implicated by the induction of a fast conformational change of tubulin and suppression of microtubule dynamics. *Mol. Cancer Ther.* **13**, 179–189.

Tinevez, J.-Y., Schulze, U., Salbreux, G., Roensch, J., Joanny, J.-F., and Paluch, E. (2009). Role of cortical tension in bleb growth. *Proc. Natl. Acad. Sci. U. S. A.* **106**, 18581–18586.

VanBuren, V., Cassimeris, L., and Odde, D. J. (2005). Mechanochemical model of microtubule structure and self-assembly kinetics. *Biophys. J.* **89**, 2911–2926.

VanBuren, V., Odde, D. J., and Cassimeris, L. (2002). Estimates of lateral and longitudinal bond energies within the microtubule lattice. *Proc. Natl. Acad. Sci. U. S. A.* **99**, 6035–6040.

Vasquez, R. J., Howell, B., Yvon, A. M., Wadsworth, P., and Cassimeris, L. (1997). Nanomolar concentrations of nocodazole alter microtubule dynamic instability in vivo and in vitro. *Mol. Biol. Cell* **8**, 973–985.

Yang, H., Ganguly, A., and Cabral, F. (2010). Inhibition of cell migration and cell division correlates with distinct effects of microtubule inhibiting drugs. *J. Biol. Chem.* **285**, 32242–32250.

Yenjerla, M., Cox, C., Wilson, L., and Jordan, M. A. (2009). Carbendazim inhibits cancer cell proliferation by



suppressing microtubule dynamics. *J. Pharmacol. Exp. Ther.* 328, 390–398.

Yvon, A. M., Wadsworth, P., and Jordan, M. A. (1999). Taxol suppresses dynamics of individual microtubules in living human tumor cells. *Mol. Biol. Cell* 10, 947–959.

Figure S1

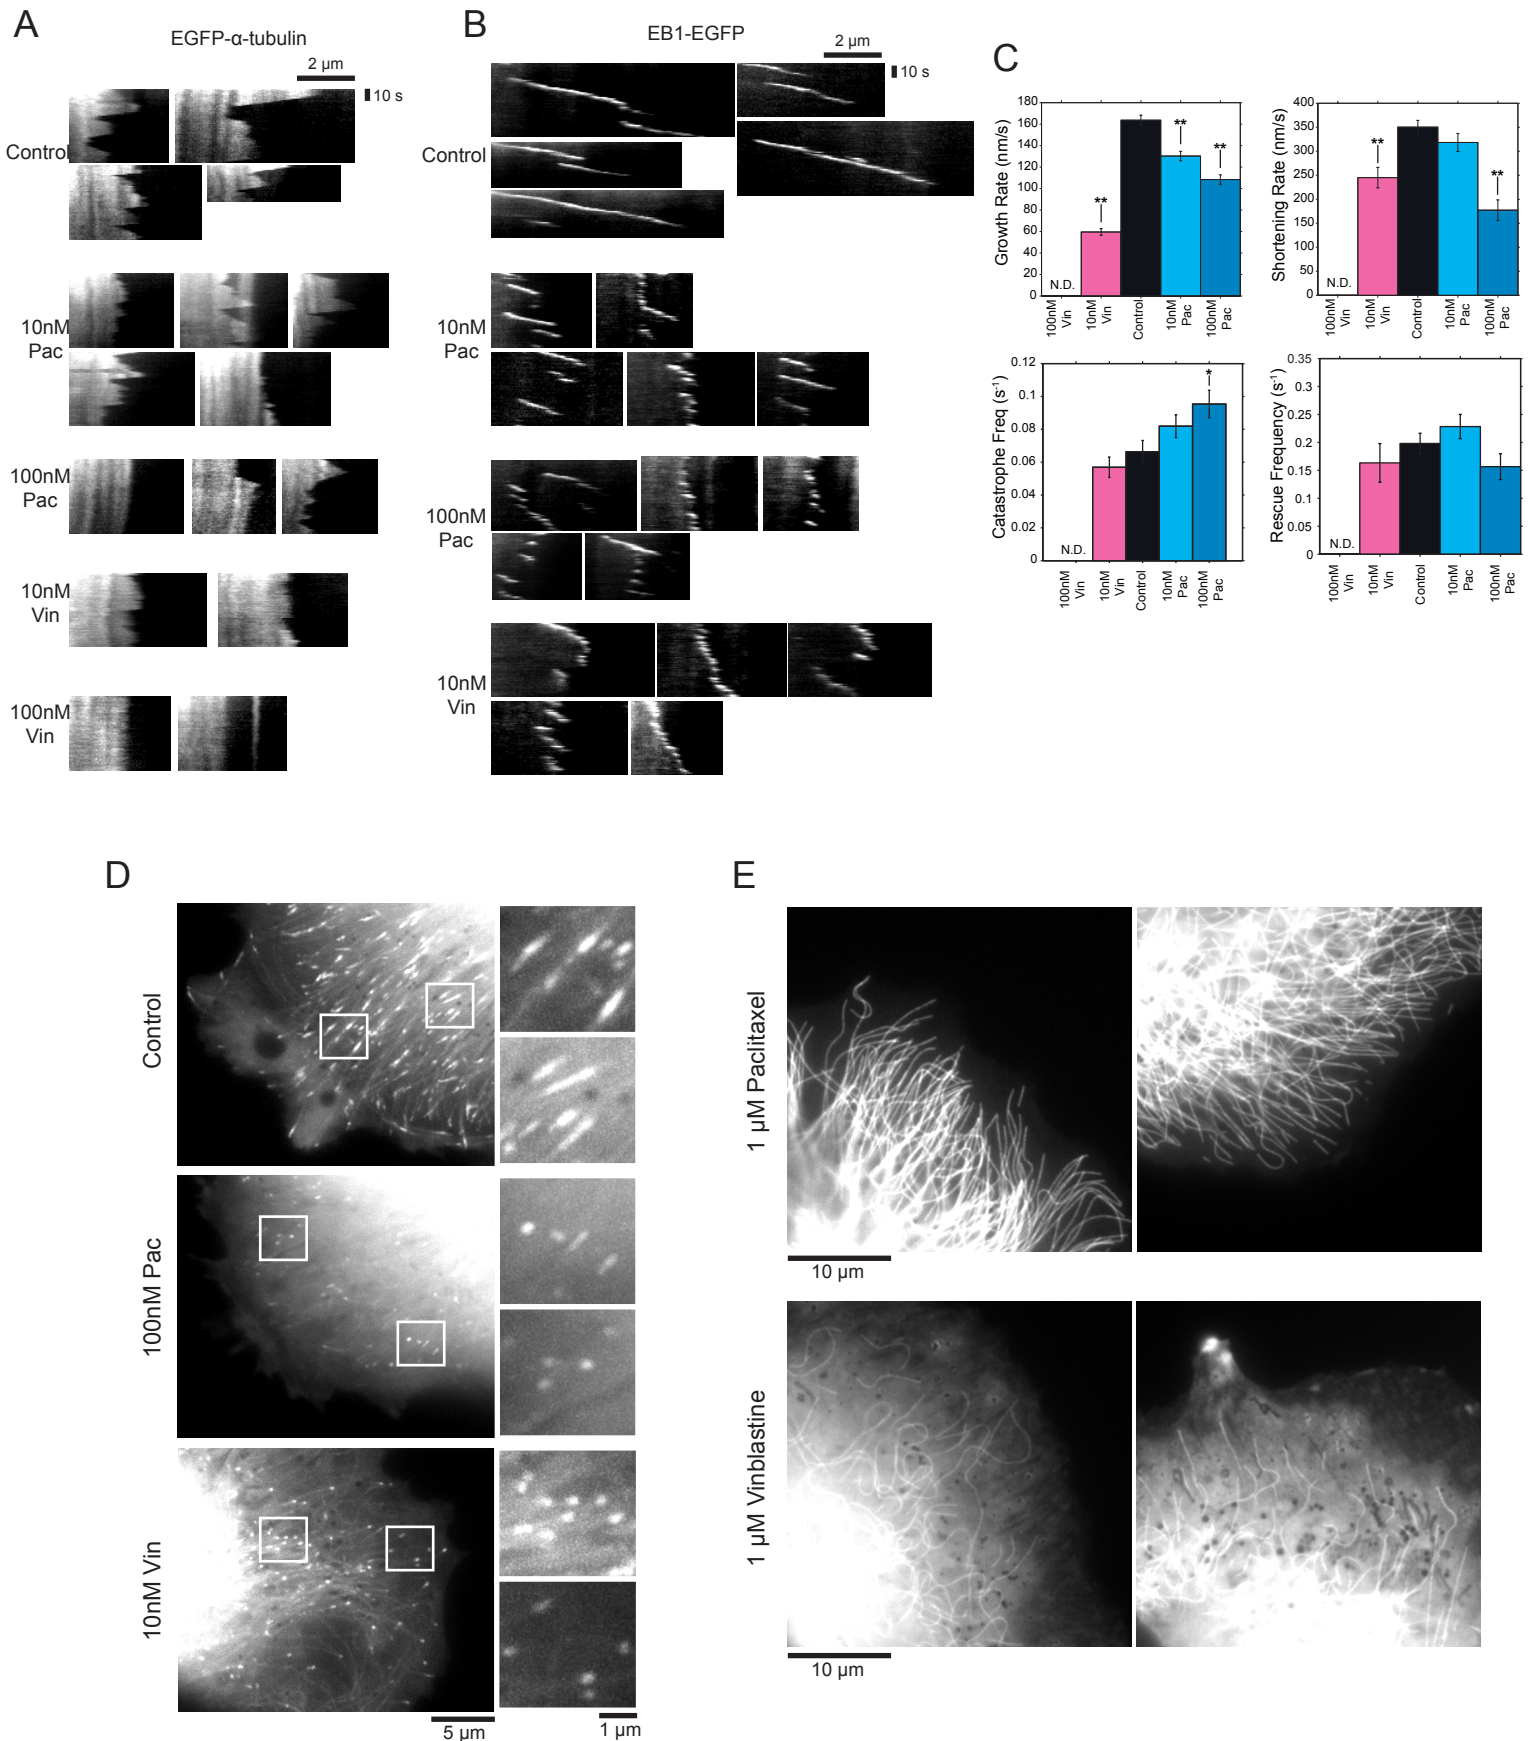

Figure S2

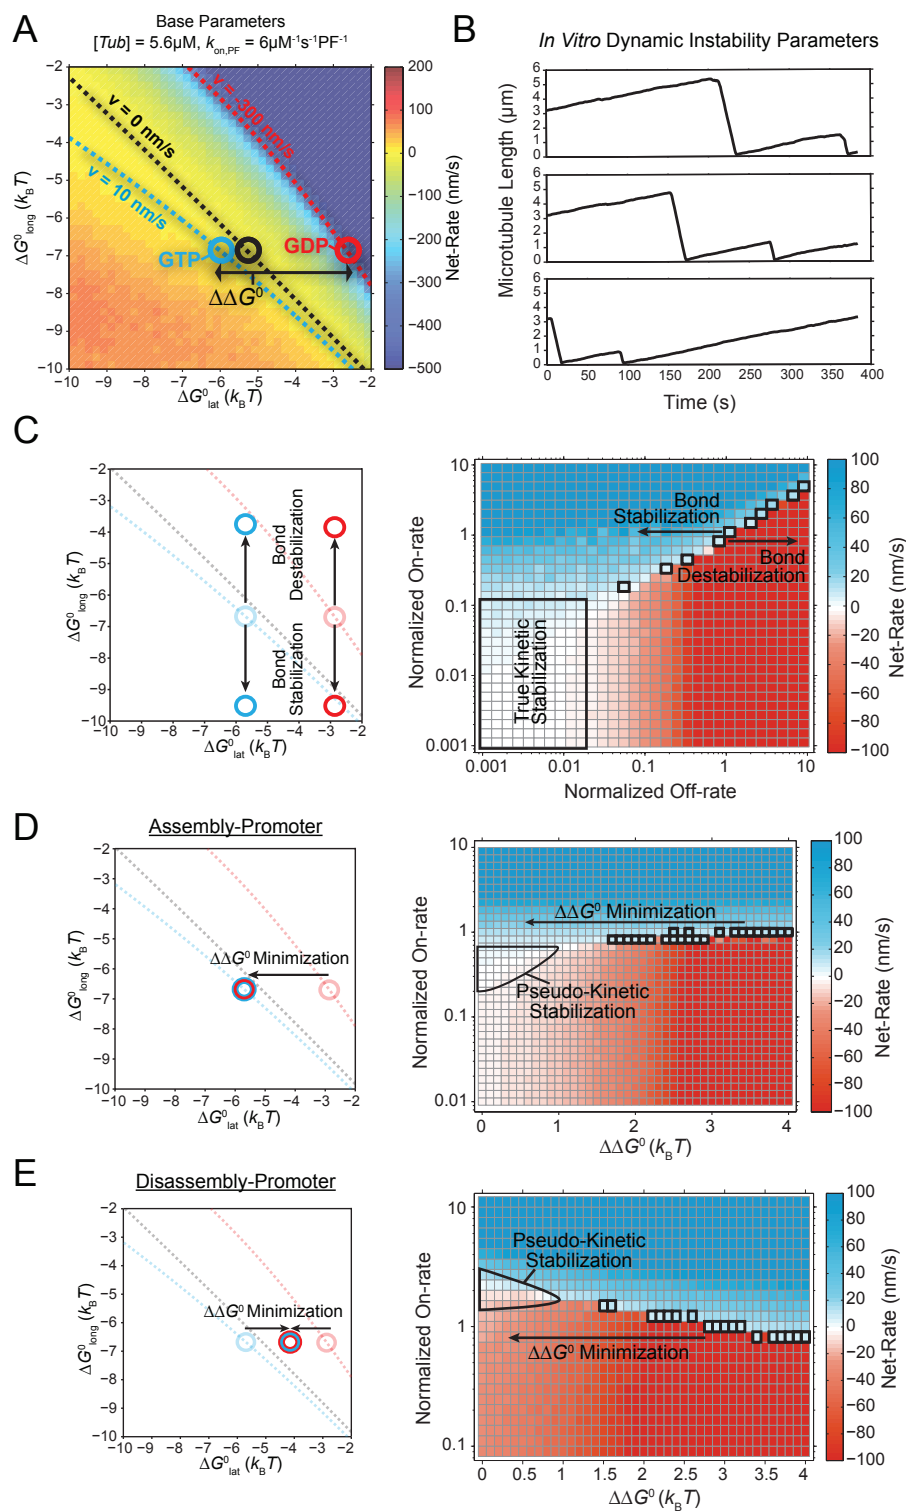

Figure S3

A

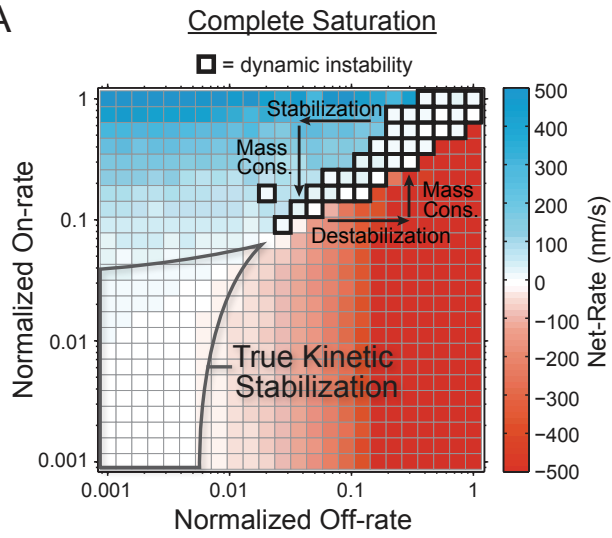

B

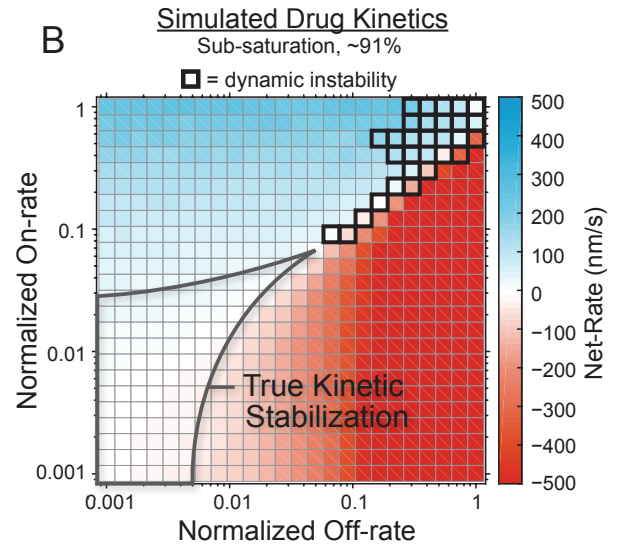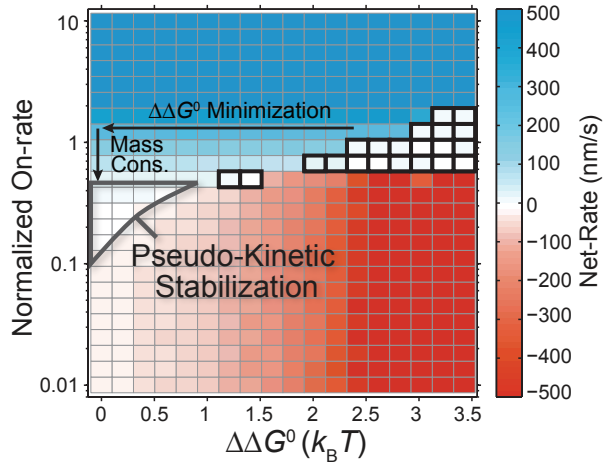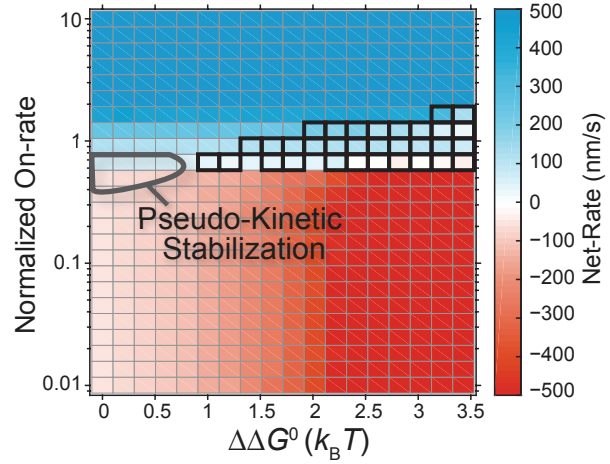

Figure S4

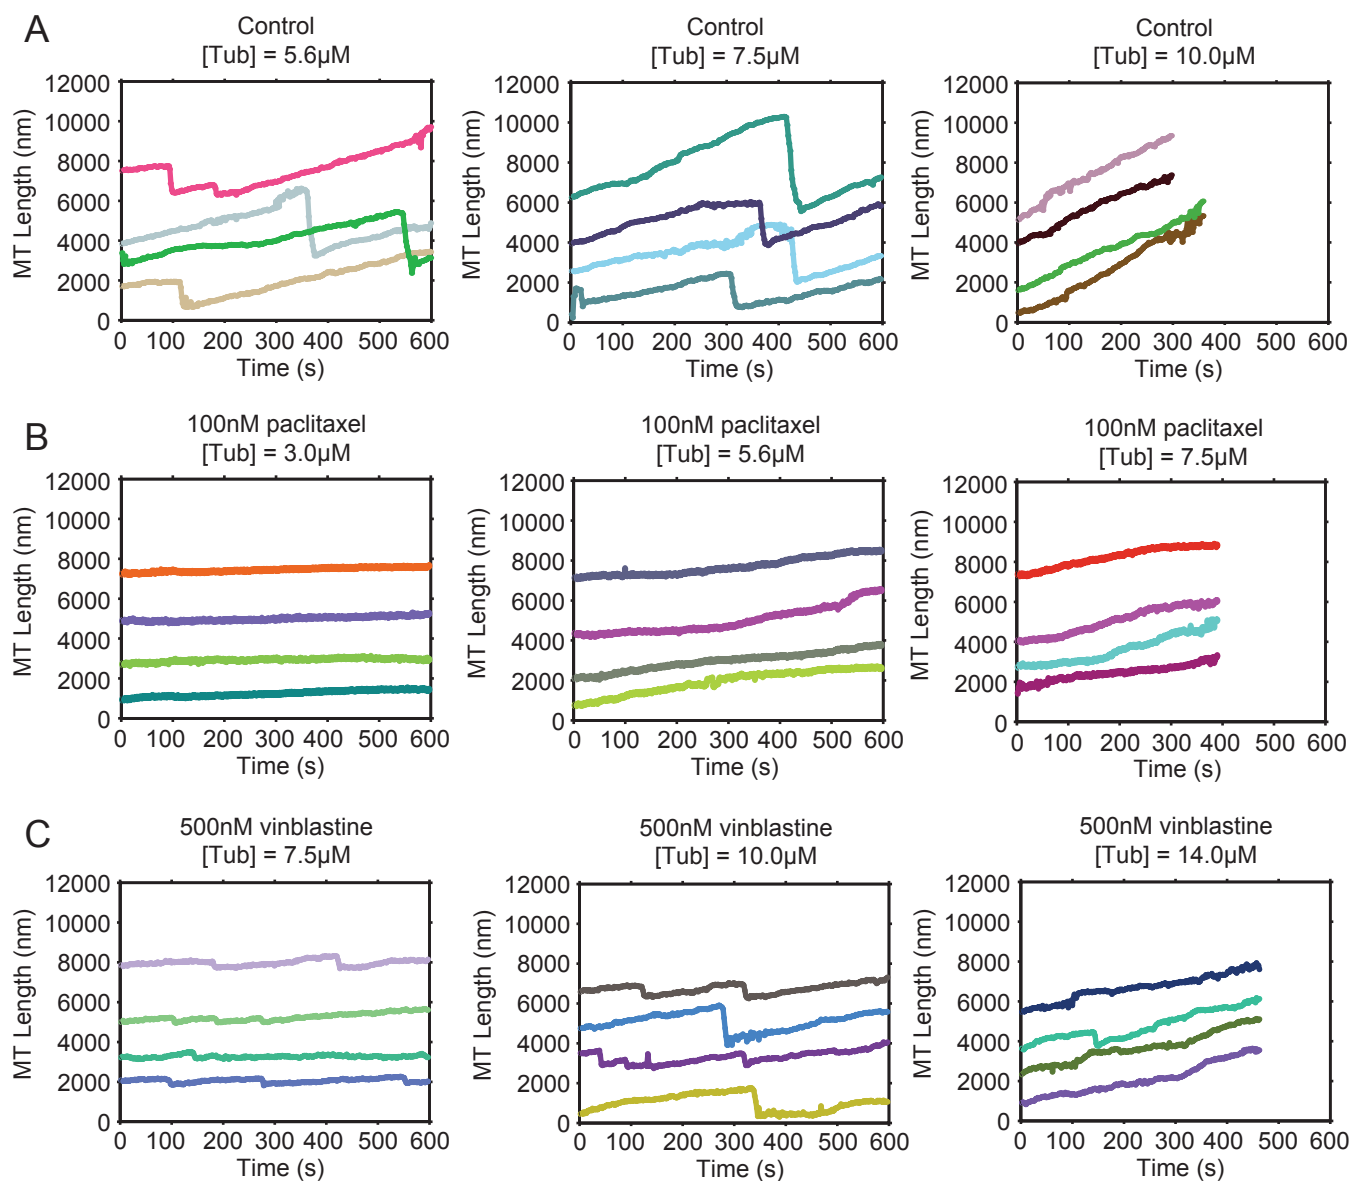

Figure S5

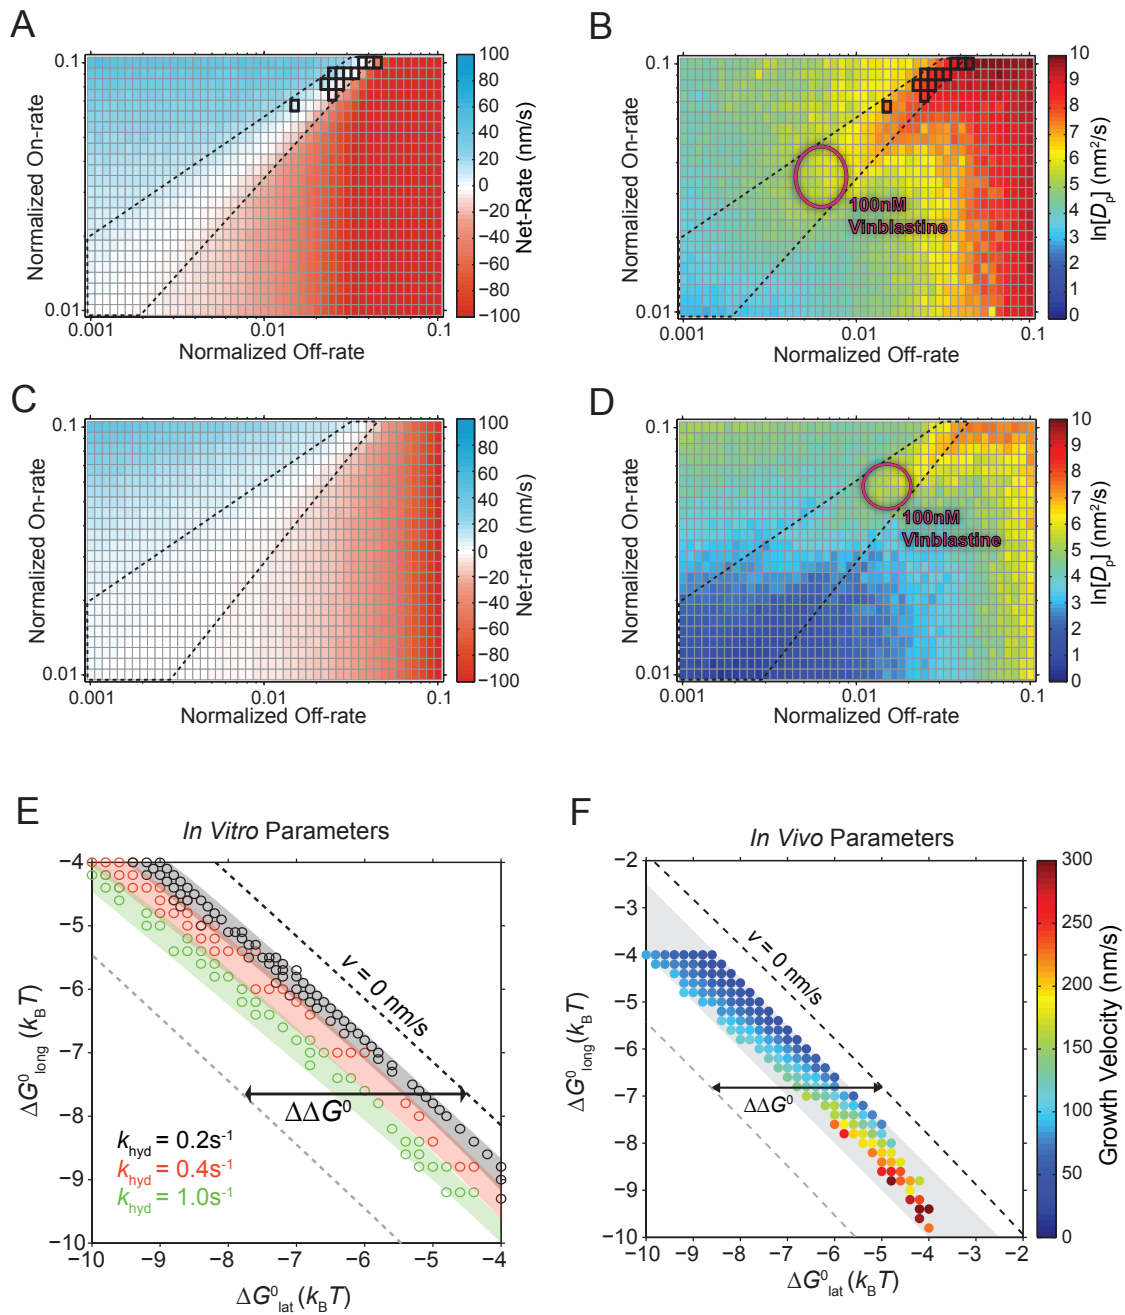

Figure S6

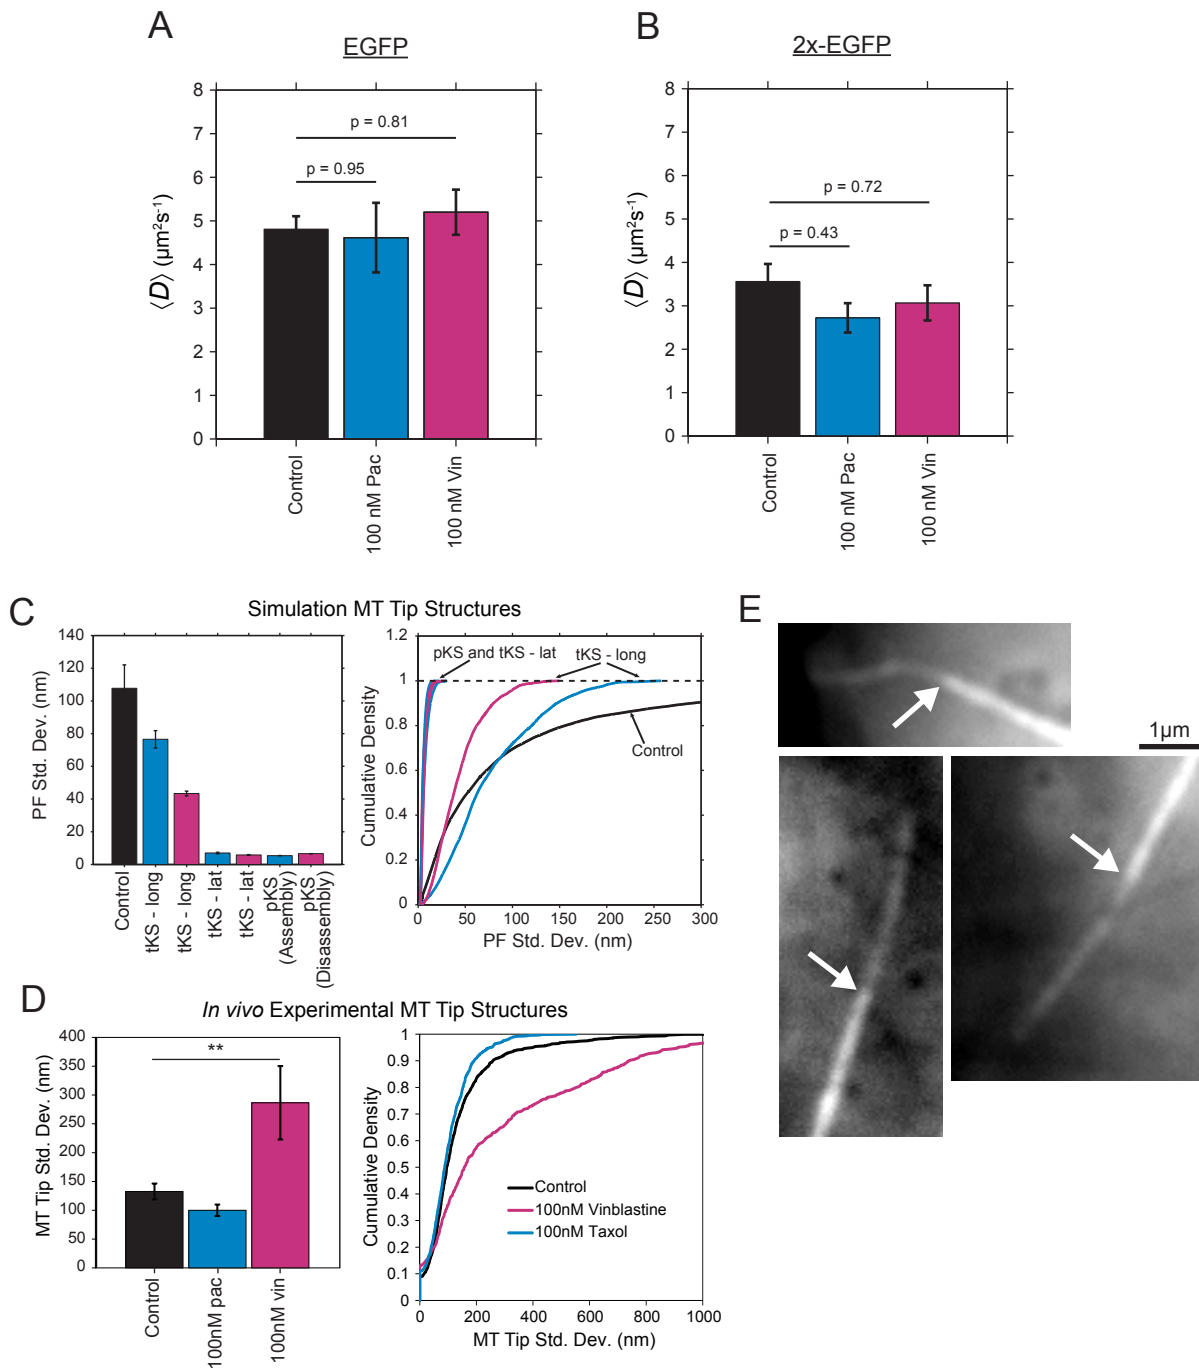

Supplement: supp_E16-08-0567v1_CombinedSupMats.pdf [file supp_E16-08-0567v1_CombinedSupMats.pdf]
